# Supplementary material for: Systems level circuit model of C. elegans undulatory locomotion: mathematical modeling and molecular genetics
Source: Springer Nature journal article supplement (doi:10.1007/s10827-007-0054-6), 2007-08-30
Supplement: MOESM1 [file 10827_2007_54_MOESM1_ESM.pdf]

## Supplementary information for

“Systems level circuit model of *C. elegans* undulatory locomotion:  
mathematical modeling and molecular genetics”

Jan Karbowski<sup>1,2,\*</sup>, Gary Schindelman<sup>1</sup>, Christopher J. Cronin<sup>1</sup>, Adeline Seah<sup>1</sup>,  
and Paul W. Sternberg<sup>1</sup>

<sup>1</sup> *Howard Hughes Medical Institute and Division of Biology 156-29,*

<sup>2</sup> *Sloan-Swartz Center for Theoretical Neurobiology, Division of Biology 216-76,  
California Institute of Technology, Pasadena, CA 91125, USA*

## 1. Supplementary Figure.

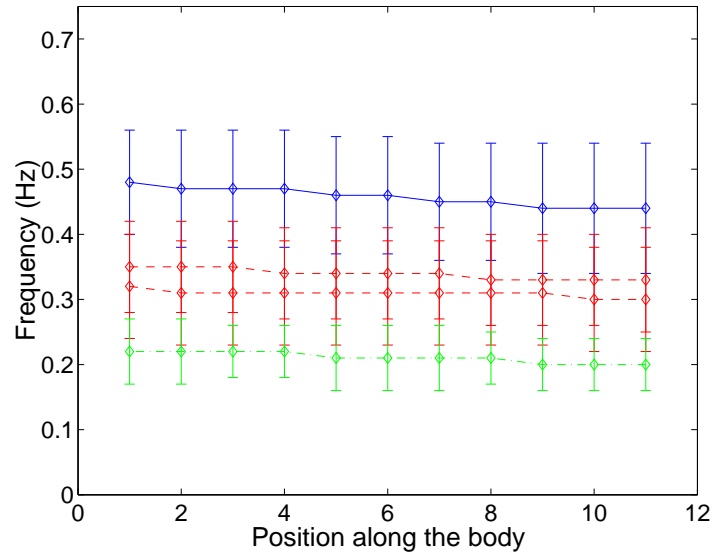

**Figure S1.** Experimental dependence of the undulatory frequency on calcium signaling in muscle cells. Mutants with defective calcium signaling *egl-19(n582); unc-119::egl-19::yfp* (these mutants are defective in neuronal and muscle calcium signaling but rescued in neurons) (the dashed red lines represent two different transgenic lines) and *unc-68(r1168)* (dashed-dotted green lines) have significantly lower frequencies than wild-type (solid blue line) (non-parametric sign-test for paired average frequencies along the body,  $p < 0.01$ ).

## 2. Supplementary Tables.

Table T1.

Distribution of the frequency of undulations and flex angle along a worm's body during forward and backward locomotion for adult wild-type (N2) *C. elegans* and mutants.

| Genotype                                     | Position  |           |           |           |           |           |
|----------------------------------------------|-----------|-----------|-----------|-----------|-----------|-----------|
|                                              | 1 (head)  | 3         | 5         | 7         | 9         | 11 (tail) |
| <i>C. elegans</i> N2 (N=62)                  |           |           |           |           |           |           |
| Frequency (Hz)                               |           |           |           |           |           |           |
| Forward motion                               | 0.48±0.08 | 0.47±0.09 | 0.46±0.09 | 0.45±0.09 | 0.44±0.10 | 0.44±0.10 |
| Backward motion                              | 0.41±0.14 | 0.33±0.16 | 0.30±0.13 | 0.32±0.15 | 0.28±0.14 | 0.31±0.16 |
| Flex (rad)                                   |           |           |           |           |           |           |
| Forward motion                               | 1.41±0.14 | 1.26±0.11 | 1.06±0.09 | 0.99±0.08 | 0.92±0.09 | 0.88±0.14 |
| Backward motion                              | 1.43±0.17 | 1.26±0.32 | 1.08±0.20 | 1.03±0.15 | 1.00±0.16 | 1.04±0.29 |
| Neuronal Mutants:                            |           |           |           |           |           |           |
| <i>unc-25(e156)</i> (N=4)                    |           |           |           |           |           |           |
| Frequency (Hz)                               |           |           |           |           |           |           |
| Forward motion                               | 0.36±0.07 | 0.34±0.08 | 0.32±0.08 | 0.27±0.10 | 0.30±0.08 | 0.23±0.06 |
| Backward motion                              | 0.20±0.08 | 0.16±0.04 | 0.14±0.04 | 0.15±0.03 | 0.18±0.04 | 0.13±0.03 |
| Flex (rad)                                   |           |           |           |           |           |           |
| Forward motion                               | 1.72±0.04 | 1.07±0.05 | 0.80±0.03 | 0.72±0.04 | 0.68±0.04 | 0.67±0.03 |
| Backward motion                              | 1.51±0.14 | 0.99±0.10 | 0.78±0.11 | 0.83±0.18 | 0.89±0.22 | 0.95±0.31 |
| <i>unc-46(e177)</i> (N=4)                    |           |           |           |           |           |           |
| Frequency (Hz)                               |           |           |           |           |           |           |
| Forward motion                               | 0.29±0.03 | 0.24±0.04 | 0.21±0.05 | 0.16±0.03 | 0.18±0.06 | 0.16±0.07 |
| Backward motion                              | 0.26±0.02 | 0.16±0.03 | 0.14±0.04 | 0.14±0.03 | 0.13±0.04 | 0.13±0.04 |
| Flex (rad)                                   |           |           |           |           |           |           |
| Forward motion                               | 1.40±0.07 | 0.91±0.06 | 0.65±0.06 | 0.55±0.02 | 0.49±0.07 | 0.52±0.09 |
| Backward motion                              | 1.21±0.13 | 0.84±0.06 | 0.63±0.04 | 0.56±0.07 | 0.60±0.16 | 0.66±0.23 |
| <i>unc-18(e81);cho-1::unc-18::yfp</i> (N=14) |           |           |           |           |           |           |
| Frequency (Hz)                               |           |           |           |           |           |           |
| Forward motion                               | 0.20±0.08 | 0.15±0.07 | 0.12±0.06 | 0.10±0.05 | 0.09±0.05 | 0.09±0.04 |
| Backward motion                              | 0.16±0.05 | 0.11±0.04 | 0.09±0.05 | 0.07±0.03 | 0.07±0.03 | 0.06±0.02 |
| Flex (rad)                                   |           |           |           |           |           |           |
| Forward motion                               | 1.10±0.17 | 0.87±0.17 | 0.64±0.16 | 0.56±0.18 | 0.48±0.15 | 0.43±0.12 |
| Backward motion                              | 1.10±0.19 | 0.78±0.20 | 0.57±0.17 | 0.50±0.18 | 0.45±0.16 | 0.42±0.13 |

Table T1 (continued).

| Genotype                                      | Position  |           |           |           |           |           |
|-----------------------------------------------|-----------|-----------|-----------|-----------|-----------|-----------|
|                                               | 1 (head)  | 3         | 5         | 7         | 9         | 11 (tail) |
| <i>slo-1(js118)</i> (N=18)                    |           |           |           |           |           |           |
| Frequency (Hz)                                |           |           |           |           |           |           |
| Forward motion                                | 0.38±0.07 | 0.35±0.07 | 0.33±0.07 | 0.32±0.07 | 0.30±0.07 | 0.29±0.08 |
| Backward motion                               | 0.32±0.07 | 0.24±0.06 | 0.21±0.06 | 0.20±0.06 | 0.17±0.05 | 0.16±0.06 |
| Flex (rad)                                    |           |           |           |           |           |           |
| Forward motion                                | 1.75±0.07 | 1.39±0.07 | 1.14±0.09 | 1.07±0.11 | 1.01±0.13 | 1.04±0.11 |
| Backward motion                               | 1.62±0.07 | 1.29±0.12 | 1.11±0.11 | 1.09±0.15 | 1.09±0.15 | 1.21±0.18 |
| Non-neuronal Mutants:                         |           |           |           |           |           |           |
| <i>egl-19(n582);<br/>unc-119::egl-19::yfp</i> |           |           |           |           |           |           |
| Line A (N=16)                                 |           |           |           |           |           |           |
| Frequency (Hz)                                |           |           |           |           |           |           |
| Forward motion                                | 0.35±0.07 | 0.35±0.07 | 0.34±0.07 | 0.34±0.07 | 0.33±0.07 | 0.33±0.08 |
| Backward motion                               | 0.35±0.12 | 0.32±0.09 | 0.31±0.09 | 0.34±0.11 | 0.31±0.09 | 0.34±0.08 |
| Flex (rad)                                    |           |           |           |           |           |           |
| Forward motion                                | 1.16±0.09 | 1.13±0.07 | 1.02±0.10 | 0.95±0.06 | 0.95±0.07 | 0.98±0.05 |
| Backward motion                               | 1.15±0.09 | 1.16±0.13 | 1.04±0.15 | 0.99±0.15 | 1.02±0.17 | 1.20±0.24 |
| Line B (N=16)                                 |           |           |           |           |           |           |
| Frequency (Hz)                                |           |           |           |           |           |           |
| Forward motion                                | 0.32±0.08 | 0.31±0.08 | 0.31±0.08 | 0.31±0.08 | 0.31±0.08 | 0.30±0.08 |
| Backward motion                               | 0.38±0.13 | 0.30±0.13 | 0.33±0.12 | 0.32±0.14 | 0.31±0.12 | 0.30±0.15 |
| Flex (rad)                                    |           |           |           |           |           |           |
| Forward motion                                | 1.23±0.11 | 1.24±0.09 | 1.12±0.11 | 1.03±0.09 | 0.98±0.06 | 1.02±0.09 |
| Backward motion                               | 1.23±0.19 | 1.25±0.21 | 1.14±0.15 | 1.09±0.19 | 1.09±0.25 | 1.28±0.29 |
| <i>unc-68(r1158)</i> (N=16)                   |           |           |           |           |           |           |
| Frequency (Hz)                                |           |           |           |           |           |           |
| Forward motion                                | 0.22±0.05 | 0.22±0.04 | 0.21±0.05 | 0.21±0.05 | 0.20±0.04 | 0.20±0.04 |
| Backward motion                               | 0.15±0.05 | 0.14±0.04 | 0.12±0.03 | 0.14±0.05 | 0.11±0.04 | 0.12±0.05 |
| Flex (rad)                                    |           |           |           |           |           |           |
| Forward motion                                | 1.53±0.10 | 1.26±0.14 | 1.09±0.15 | 1.01±0.13 | 1.02±0.14 | 1.07±0.15 |
| Backward motion                               | 1.39±0.18 | 1.17±0.11 | 1.03±0.14 | 0.95±0.13 | 0.98±0.17 | 1.10±0.16 |

Table T1 (continued).

| Genotype                   | Position  |           |           |           |           |           |
|----------------------------|-----------|-----------|-----------|-----------|-----------|-----------|
|                            | 1 (head)  | 3         | 5         | 7         | 9         | 11 (tail) |
| <i>unc-54(s74)</i> (N=5)   |           |           |           |           |           |           |
| Frequency (Hz)             |           |           |           |           |           |           |
| Forward motion             | 0.09±0.01 | 0.08±0.02 | 0.08±0.02 | 0.07±0.03 | 0.08±0.02 | 0.07±0.03 |
| Backward motion            | 0.10±0.02 | 0.09±0.01 | 0.08±0.01 | 0.08±0.01 | 0.08±0.01 | 0.08±0.02 |
| Flex (rad)                 |           |           |           |           |           |           |
| Forward motion             | 1.63±0.27 | 1.38±0.24 | 1.13±0.29 | 1.10±0.26 | 1.17±0.23 | 1.20±0.27 |
| Backward motion            | 1.53±0.09 | 1.41±0.05 | 1.30±0.10 | 1.31±0.10 | 1.50±0.17 | 1.69±0.10 |
| <i>unc-54(s95)</i> (N=5)   |           |           |           |           |           |           |
| Frequency (Hz)             |           |           |           |           |           |           |
| Forward motion             | 0.07±0.01 | 0.07±0.01 | 0.07±0.01 | 0.07±0.01 | 0.07±0.01 | 0.07±0.01 |
| Backward motion            | 0.06±0.01 | 0.06±0.01 | 0.06±0.00 | 0.06±0.01 | 0.06±0.00 | 0.06±0.01 |
| Flex (rad)                 |           |           |           |           |           |           |
| Forward motion             | 0.86±0.06 | 0.81±0.05 | 0.69±0.06 | 0.65±0.05 | 0.71±0.05 | 0.86±0.06 |
| Backward motion            | 0.65±0.05 | 0.65±0.06 | 0.57±0.05 | 0.58±0.07 | 0.66±0.08 | 0.83±0.11 |
| <i>unc-54(st130)</i> (N=5) |           |           |           |           |           |           |
| Frequency (Hz)             |           |           |           |           |           |           |
| Forward motion             | 0.05±0.01 | 0.05±0.01 | 0.05±0.00 | 0.04±0.01 | 0.05±0.00 | 0.05±0.01 |
| Backward motion            | 0.05±0.01 | 0.04±0.01 | 0.04±0.01 | 0.04±0.00 | 0.04±0.01 | 0.06±0.02 |
| Flex (rad)                 |           |           |           |           |           |           |
| Forward motion             | 0.52±0.09 | 0.46±0.12 | 0.44±0.07 | 0.42±0.07 | 0.49±0.06 | 0.65±0.07 |
| Backward motion            | 0.45±0.07 | 0.41±0.09 | 0.40±0.06 | 0.39±0.05 | 0.46±0.05 | 0.64±0.06 |
| <i>unc-54(st132)</i> (N=5) |           |           |           |           |           |           |
| Frequency (Hz)             |           |           |           |           |           |           |
| Forward motion             | 0.16±0.02 | 0.16±0.03 | 0.15±0.03 | 0.15±0.03 | 0.15±0.03 | 0.15±0.03 |
| Backward motion            | 0.17±0.04 | 0.14±0.04 | 0.12±0.03 | 0.12±0.03 | 0.11±0.02 | 0.14±0.05 |
| Flex (rad)                 |           |           |           |           |           |           |
| Forward motion             | 1.37±0.12 | 1.20±0.14 | 1.06±0.11 | 1.03±0.13 | 1.02±0.14 | 1.18±0.15 |
| Backward motion            | 1.16±0.12 | 1.02±0.11 | 1.00±0.10 | 1.00±0.17 | 1.06±0.20 | 1.36±0.22 |
| <i>unc-54(st134)</i> (N=5) |           |           |           |           |           |           |
| Frequency (Hz)             |           |           |           |           |           |           |
| Forward motion             | 0.08±0.01 | 0.08±0.01 | 0.08±0.01 | 0.08±0.01 | 0.08±0.01 | 0.08±0.01 |
| Backward motion            | 0.08±0.02 | 0.08±0.02 | 0.07±0.02 | 0.08±0.02 | 0.07±0.02 | 0.10±0.02 |
| Flex (rad)                 |           |           |           |           |           |           |
| Forward motion             | 1.19±0.05 | 1.11±0.06 | 0.96±0.07 | 0.92±0.08 | 0.98±0.03 | 1.06±0.06 |
| Backward motion            | 1.07±0.05 | 1.02±0.08 | 0.88±0.12 | 0.88±0.06 | 0.98±0.06 | 1.10±0.18 |

Table T1 (continued).

| Genotype                   | Position  |           |           |           |           |           |
|----------------------------|-----------|-----------|-----------|-----------|-----------|-----------|
|                            | 1 (head)  | 3         | 5         | 7         | 9         | 11 (tail) |
| <i>unc-54(st135)</i> (N=5) |           |           |           |           |           |           |
| Frequency (Hz)             |           |           |           |           |           |           |
| Forward motion             | 0.06±0.01 | 0.05±0.01 | 0.05±0.01 | 0.05±0.01 | 0.06±0.00 | 0.05±0.01 |
| Backward motion            | 0.06±0.01 | 0.05±0.01 | 0.05±0.01 | 0.05±0.01 | 0.06±0.01 | 0.06±0.01 |
| Flex (rad)                 |           |           |           |           |           |           |
| Forward motion             | 0.78±0.06 | 0.64±0.10 | 0.52±0.10 | 0.49±0.07 | 0.58±0.08 | 0.77±0.03 |
| Backward motion            | 0.67±0.07 | 0.59±0.07 | 0.49±0.07 | 0.47±0.11 | 0.61±0.13 | 0.83±0.12 |
| <i>sqt-1(sc101)</i> (N=13) |           |           |           |           |           |           |
| Frequency (Hz)             |           |           |           |           |           |           |
| Forward motion             | 0.29±0.06 | 0.27±0.07 | 0.26±0.07 | 0.26±0.07 | 0.25±0.07 | 0.22±0.07 |
| Backward motion            | 0.23±0.08 | 0.18±0.07 | 0.18±0.06 | 0.17±0.07 | 0.15±0.06 | 0.14±0.06 |
| Flex (rad)                 |           |           |           |           |           |           |
| Forward motion             | 1.40±0.08 | 1.14±0.13 | 0.93±0.14 | 0.83±0.08 | 0.76±0.09 | 0.72±0.13 |
| Backward motion            | 1.36±0.13 | 1.02±0.16 | 0.86±0.16 | 0.78±0.14 | 0.73±0.13 | 0.75±0.15 |
| <i>sqt-1(sc103)</i> (N=5)  |           |           |           |           |           |           |
| Frequency (Hz)             |           |           |           |           |           |           |
| Forward motion             | 0.29±0.07 | 0.28±0.10 | 0.27±0.10 | 0.26±0.10 | 0.25±0.10 | 0.22±0.09 |
| Backward motion            | 0.22±0.05 | 0.15±0.06 | 0.15±0.07 | 0.11±0.04 | 0.12±0.05 | 0.12±0.04 |
| Flex (rad)                 |           |           |           |           |           |           |
| Forward motion             | 1.27±0.13 | 1.12±0.10 | 0.96±0.11 | 0.86±0.09 | 0.77±0.09 | 0.71±0.13 |
| Backward motion            | 1.31±0.08 | 1.06±0.16 | 0.95±0.16 | 0.82±0.12 | 0.73±0.06 | 0.69±0.06 |
| BE109 (N=9)                |           |           |           |           |           |           |
| Frequency (Hz)             |           |           |           |           |           |           |
| Forward motion             | 0.19±0.06 | 0.18±0.06 | 0.18±0.06 | 0.18±0.07 | 0.18±0.07 | 0.18±0.07 |
| Backward motion            | 0.14±0.07 | 0.12±0.05 | 0.12±0.06 | 0.14±0.08 | 0.11±0.03 | 0.13±0.07 |
| Flex (rad)                 |           |           |           |           |           |           |
| Forward motion             | 1.48±0.16 | 1.62±0.17 | 1.54±0.20 | 1.46±0.21 | 1.40±0.30 | 1.16±0.33 |
| Backward motion            | 1.40±0.22 | 1.45±0.26 | 1.41±0.29 | 1.27±0.27 | 1.25±0.36 | 1.08±0.40 |

All data refer to worms moving on plates with food.

Table T2.

Distribution of the frequency (Hz) of undulations along worm's body during forward locomotion for *slo-1* mutants with transgenes.

| Genotype                                                               | Position  |           |           |           |           |           |
|------------------------------------------------------------------------|-----------|-----------|-----------|-----------|-----------|-----------|
|                                                                        | 1 (head)  | 3         | 5         | 7         | 9         | 11 (tail) |
| <i>slo-1(js118); Pacr-2::gfp</i><br>(N=19)                             | 0.43±0.07 | 0.38±0.09 | 0.32±0.11 | 0.30±0.12 | 0.28±0.12 | 0.25±0.13 |
| <i>slo-1(js118); Pacr-2::slo-1</i>                                     |           |           |           |           |           |           |
| Line A (N=19)                                                          | 0.43±0.05 | 0.42±0.06 | 0.37±0.08 | 0.35±0.09 | 0.33±0.08 | 0.31±0.09 |
| Line B (N=18)                                                          | 0.41±0.06 | 0.37±0.07 | 0.36±0.07 | 0.34±0.07 | 0.33±0.08 | 0.31±0.07 |
| Line C (N=18)                                                          | 0.37±0.07 | 0.33±0.09 | 0.31±0.09 | 0.29±0.09 | 0.28±0.09 | 0.27±0.09 |
| Line D (N=17)                                                          | 0.36±0.05 | 0.32±0.06 | 0.29±0.06 | 0.28±0.06 | 0.26±0.06 | 0.25±0.06 |
| <i>slo-1(js118); Pacr-2::slo-1;</i><br><i>Punc-25::slo-1</i><br>(N=21) | 0.47±0.08 | 0.46±0.08 | 0.43±0.10 | 0.41±0.10 | 0.40±0.10 | 0.40±0.10 |
| <i>slo-1(js118); Psnb-1::slo-1</i><br>(N=20)                           | 0.48±0.07 | 0.46±0.07 | 0.43±0.08 | 0.40±0.09 | 0.38±0.09 | 0.37±0.09 |
| <i>slo-1(js118); Punc-25::slo-1</i>                                    |           |           |           |           |           |           |
| Line A (N=18)                                                          | 0.44±0.07 | 0.41±0.07 | 0.40±0.08 | 0.39±0.07 | 0.37±0.08 | 0.36±0.08 |
| Line B (N=16)                                                          | 0.46±0.07 | 0.42±0.09 | 0.41±0.10 | 0.40±0.10 | 0.38±0.10 | 0.37±0.10 |
| <i>slo-1(js118); Punc-17::slo-1</i>                                    |           |           |           |           |           |           |
| Line A (N=16)                                                          | 0.45±0.11 | 0.42±0.11 | 0.39±0.12 | 0.37±0.12 | 0.36±0.12 | 0.34±0.12 |
| Line B (N=18)                                                          | 0.48±0.06 | 0.47±0.06 | 0.45±0.07 | 0.43±0.08 | 0.41±0.09 | 0.40±0.09 |
| Line C (N=18)                                                          | 0.45±0.09 | 0.44±0.09 | 0.42±0.09 | 0.40±0.09 | 0.39±0.10 | 0.37±0.09 |
| <i>slo-1(js118); Pcho-1::slo-1</i>                                     |           |           |           |           |           |           |
| Line A (N=18)                                                          | 0.46±0.06 | 0.43±0.07 | 0.40±0.07 | 0.36±0.08 | 0.33±0.10 | 0.31±0.09 |
| Line B (N=18)                                                          | 0.44±0.06 | 0.42±0.07 | 0.39±0.07 | 0.37±0.07 | 0.36±0.08 | 0.34±0.08 |
| Line C (N=17)                                                          | 0.37±0.06 | 0.34±0.08 | 0.31±0.08 | 0.29±0.08 | 0.27±0.08 | 0.25±0.08 |

Worms *slo-1(js118); Pacr-2::slo-1; Punc-25::slo-1* and *slo-1(js118); Psnb-1::slo-1* have presumably wild-type levels of GABA and acetylcholine signaling. This is partly confirmed based on their spatial frequency patterns, which are statistically indistinguishable from the

wild-type pattern (non-parametric sign test for paired average frequencies,  $p > 0.05$ ).

### 3. Supplementary Methods.

*Molecular biology: plasmid and strain construction*

a) *slo-1*: transgenic strains and plasmids.

The following strains and plasmids were a gift from Andrew Davies and Steven McIntire and the construction is described in (Davies et al, 2003):

Strains:

BZ802 *slo-1(js118)*; *egEx25[Pacr-2::slo-1(+)Pacr::gfp]*,

BZ798 *slo-1(js118)*; *egEx24[Pacr-2::slo-1(+); Punc-25::slo-1(+); Pacr::gfp]*,

BZ812 *slo-1(js118)*; *egEx26[Pacr::gfp]*

and BZ416 *slo-1(js118)*; *egEx23[Psnb-1::slo-1(+) H20::gfp]*.

Plasmids:

*Punc-25::slo-1(+)*, *Pacr-2::slo-1(+)*, *Pacr-2::gfp* and pBK3.1 (Wang et al, 2001).

New *slo-1* transgenic strains and plasmids:

Strains: *Punc-25::slo-1(+)* was injected at 7.5 ng/ $\mu$ l with a coinjection marker of *Pmyo-2::gfp* at 5 ng/ $\mu$ l into *slo-1(js118)* animals using pBSKS as a carrier to create *slo-1(js118); Ex[Punc-25::slo-1(+)] Pmyo::gfp*. Strains carrying *Punc-17::slo-1(+)* or *Pcho-1::slo-1(+)*, were created similarly. *Pacr-2::slo-1(+)* was injected at 7.5 ng/ $\mu$ l with a coinjection marker



of *Pmyo-2::gfp* at 5 ng/ $\mu$ l into *slo-1(js118)* using pBSKS as a carrier to create additional lines with the same genotype as BZ802, excepting the marker used for coinjection.

Plasmids: To create *Punc-17::slo-1(+)* and *Pcho-1::slo-1(+)*, promoters were excised from *unc-17::UNC-18::YFP* and *cho-1::UNC-18::YFP* respectively (Schindelman et al, 2006), blunt ended and ligated into pBK3.1 (*slo-1* cDNA controlled by *snb-1* promoter) after the *snb-1* promoter was removed.

b) *Punc-119::egl-19::yfp*, plasmid and transgenic strain.

To create this plasmid we followed the protocol used by (Garcia et al, 2001) to create *Pmyo-3::egl-19::gfp* with the following modifications. The promoter vector used was pBSKS containing the *unc-119* promoter sequence inserted directionally into the NotI and PstI sites (see below for *unc-119* promoter primers). A SalI site was added to the forward primer used to amplify *egl-19* to facilitate directional cloning to the *unc-119* promoter and a YFP version of pPD95.75 (pSX95.75) was used. The genomic *egl-19* PCR fragment was cut with SalI and three-way ligated to SalI/KpnI cut pBSKS containing the *unc-119* promoter and SmaI/XbaI cut pSX95.75 at a molar ratio of 8:2:1, PCR product to *unc-119* promoter vector to YFP vector. The *Punc-119::egl-19::yfp* ligation mix was injected at 200 ng/ $\mu$ l.

c) *Pcho-1:unc-18::yfp* plasmids and transgenic strains.

For *Pcho-1:unc-18::yfp* plasmid construction, see Schindelman et al (2006). This plasmid was injected at 75 ng/ $\mu$ l with a coinjection marker of *Pmyo-2::gfp* at 5 ng/ $\mu$ l into *unc-18(e81)* animals using pBSKS as a carrier to create *unc-18(e81); syEx788[Pcho-1:unc-18::yfp Pmyo::gfp]*.

d) Strains created for this work:

The following strains are from this work:

PS5407 (*egl-19(n582); syEx993[unc-119::egl-19::yfp]* line A),  
PS5406 (*egl-19(n582); syEx992[unc-119::egl-19::yfp]* line B),  
PS5410 (*slo-1(js118); syEx996[Pacr-2::slo-1]* line C),  
PS5382 (*slo-1(js118); syEx988[Pacr-2::slo-1]* line D),  
PS5387 (*slo-1(js118); syEx991[Pacr-2::slo-1]* line B),  
PS5379 (*slo-1(js118); syEx985[Punc-25::slo-1]* line A),  
PS5408 (*slo-1(js118); syEx985[Punc-25::slo-1]* line A),  
PS5380 (*slo-1(js118); syEx986[Punc-17::slo-1]* line A),  
PS5375 (*slo-1(js118); syEx982[Punc-17::slo-1]* line B),  
PS5381 (*slo-1(js118); syEx987[Punc-17::slo-1]* line C),  
PS5383 (*slo-1(js118); syEx989[Pcho-1::slo-1]* line A),  
PS5384 (*slo-1(js118); syEx990[Pcho-1::slo-1]* line B),  
PS5409 (*slo-1(js118); syEx995[Pcho-1::slo-1]* line C),  
PS5191 (*unc-18(e81); syEx981[cho-1::unc-18::yfp]*).

## References

- Davies AG et al. (2003). A central role of the BK potassium channel in behavioral responses to ethanol in *C. elegans*. *Cell* 115: 655-666.
- Schindelman G, Whittaker AJ, Thum JY, Gharib S, Sternberg PW (2006). Initiation of male sperm-transfer behavior in *Caenorhabditis elegans* requires input from the ventral nerve cord. *BMC Biol.* 4: 26.
- Wang ZW, Saifee O, Nonet ML, Salkoff L (2001). SLO-1 potassium channels control quantal

content of neurotransmitter release at the *C. elegans* neuromuscular junction. *Neuron* 32:  
867-81.
